# Supplementary material for: Eugenol diffusion coefficient and its potential to control Sitophilus zeamais in rice
Source: PubMed Central journal article supplement (PMC6671970; doi:10.1038/s41598-019-47562-1), 2019-08-01
Supplement: 41598_2019_47562_MOESM1_ESM.pdf [file 41598_2019_47562_MOESM1_ESM.pdf]

1 ***Supplementary information***

2 **Eugenol diffusion coefficient and its potential to control *Sitophilus zeamais* in rice**

3 Lucas Henrique Figueiredo Prates<sup>a1</sup>, Lêda Rita D'Antonino Faroni<sup>a2\*</sup>, Fernanda Fernandes  
4 Heleno<sup>b3</sup>, Maria Eliana Lopes Ribeiro de Queiroz<sup>c4</sup>, Adalberto Hipólito de Sousa<sup>a,d5</sup>, and  
5 Marcus Vinícius de Assis Silva<sup>a6</sup>

6

<sup>a</sup>Departamento de Engenharia Agrícola, Universidade Federal de Viçosa, Viçosa, 36570900, Minas Gerais, Brazil.

<sup>b</sup>Serviço Autônomo de Água e Esgoto, SAAE, Senador Firmino, 36540000, Minas Gerais, Brazil.

<sup>c</sup>Departamento de Química, Universidade Federal de Viçosa, Viçosa, 36570900, Minas Gerais, Brazil.

<sup>d</sup>Centro de Ciências Biológicas e da Natureza, Universidade Federal de Acre, Rio Branco, 69920900, Acre, Brazil.

\*Corresponding author. Tel.: +55 (31) 3899-1874, Fax +55 (31) 3899-2735, [lfaroni@ufv.br](mailto:lfaroni@ufv.br)

ORCID, email:

<sup>1</sup>0000-0003-0739-5597, [lucas.prates@ufv.br](mailto:lucas.prates@ufv.br)

<sup>2</sup>0000-0001-8648-5034, [lfaroni@ufv.br](mailto:lfaroni@ufv.br)

<sup>3</sup>0000-0002-0423-5662, [fernandafhg@gmail.com](mailto:fernandafhg@gmail.com)

<sup>4</sup>0000-0003-4717-9223, [meliana@ufv.br](mailto:meliana@ufv.br)

<sup>5</sup>0000-0002-3089-2762, [adalbertohipolito@hotmail.com](mailto:adalbertohipolito@hotmail.com)

7 <sup>6</sup>0000-0002-5169-0203, [marcus.assis@ufv.br](mailto:marcus.assis@ufv.br)

8

9

10 Correspondence: Lêda Rita D'Antonino Faroni, Departamento de Engenharia Agrícola,  
11 Universidade Federal de Viçosa, 36570-900, Viçosa, Minas Gerais, Brasil; Tel: + 55 31 3899-  
12 1874; e-mail: [lfaroni@gmail.com](mailto:lfaroni@gmail.com)

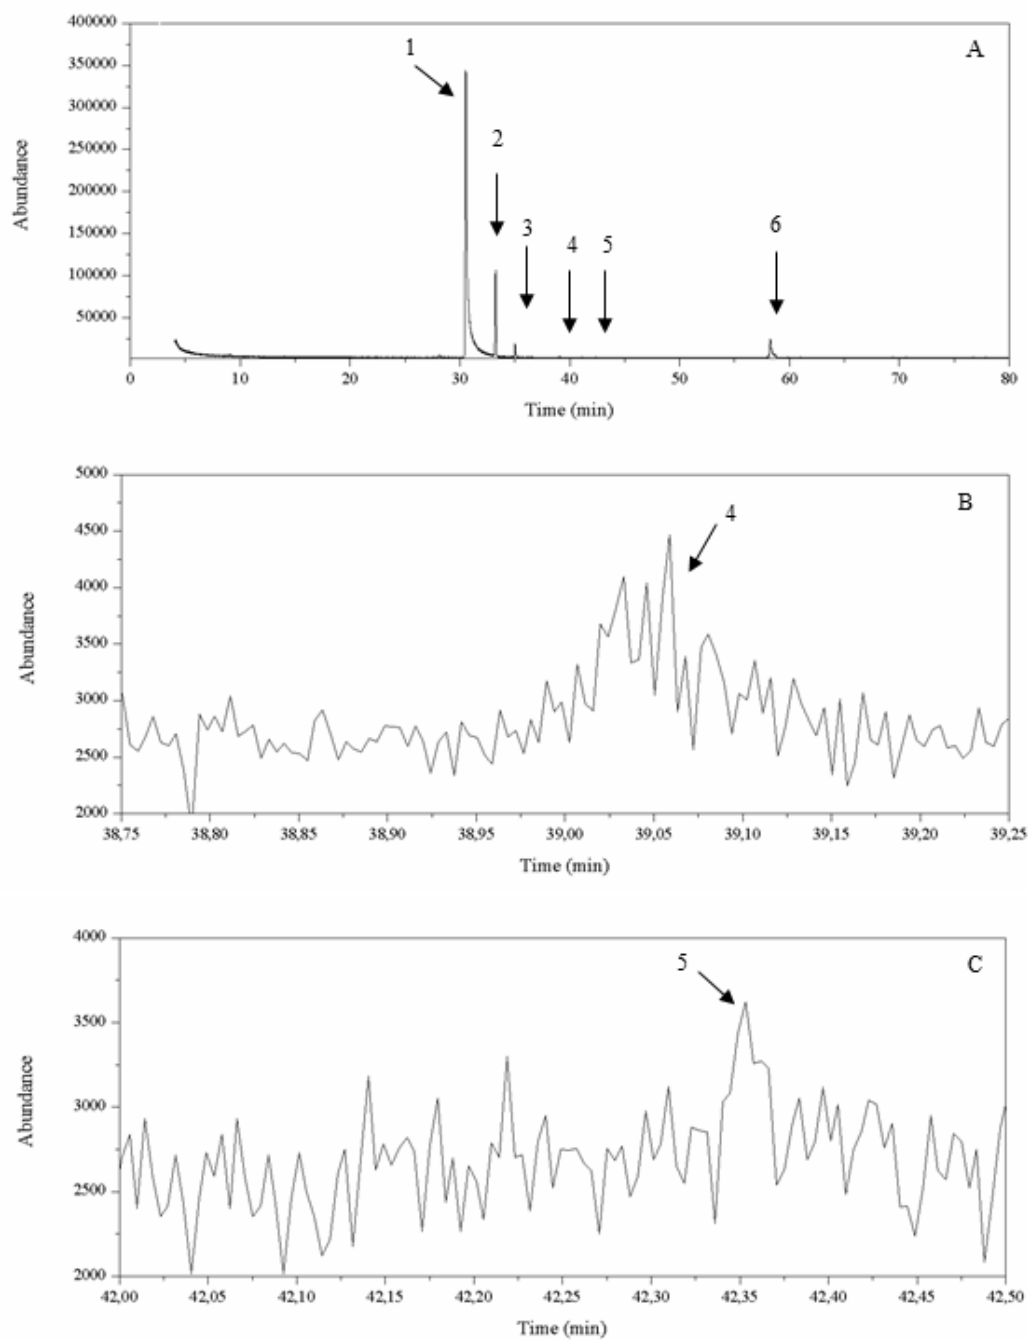

13

14 **Figure S1** Chromatogram obtained from the injection of the essential oil of clove into gas  
 15 chromatograph coupled to mass spectrometry (A), with zoom at the Retention time (Rt) related  
 16 to the peaks number 4 (B) and number 5 (C). The numbers indicate the peaks of the following  
 17 compounds and Rt (min), respectively: 1: eugenol, 30.55 min; 2:  $\beta$ -caryophyllene, 33.24 min;  
 18 3:  $\alpha$ -caryophyllene, 35.01 min; 4: epizonarene, 39.06 min; 5: caryophyllene oxide, 42.35 min;  
 19 6: hexadecanol, 58.24 min.

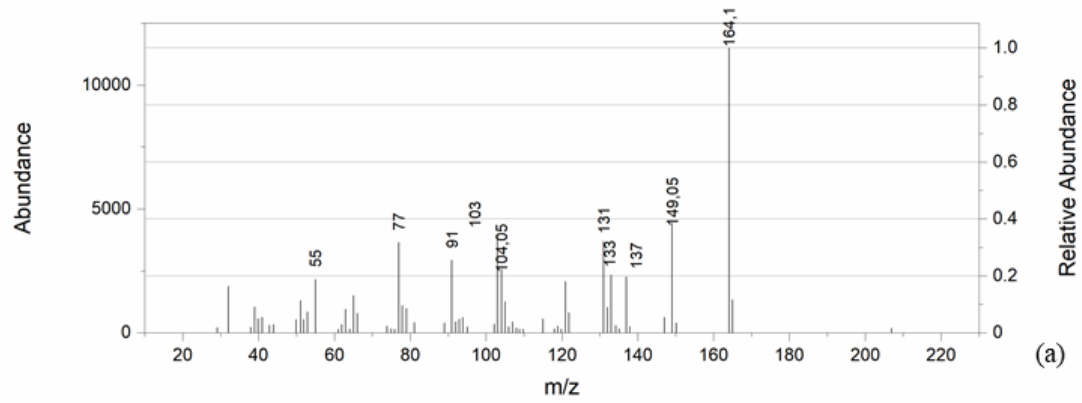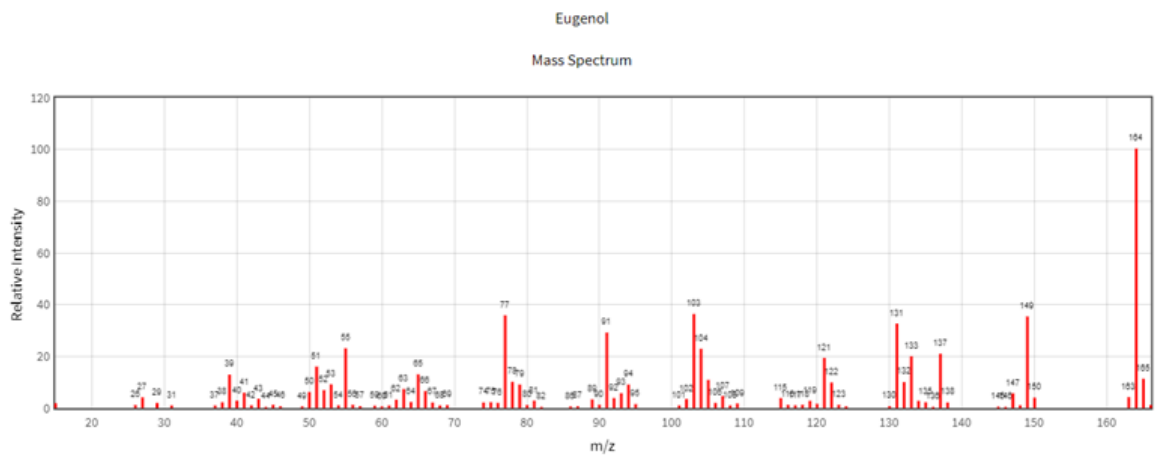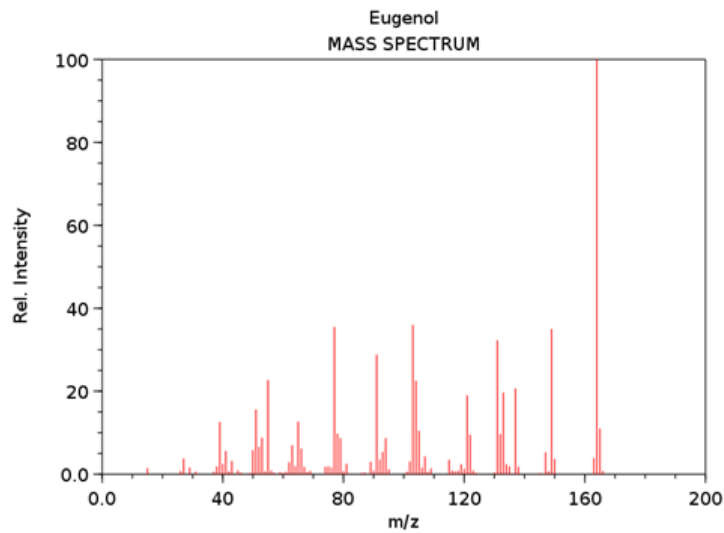

20

21 **Figure S2** Mass to charge ratio (m/z) plot related to the chromatographic peak with retention  
 22 time of 30.55 min (a), identified as eugenol, and the m/z plots for the identified compound  
 23 according to the NIST library (b) and (c).

24

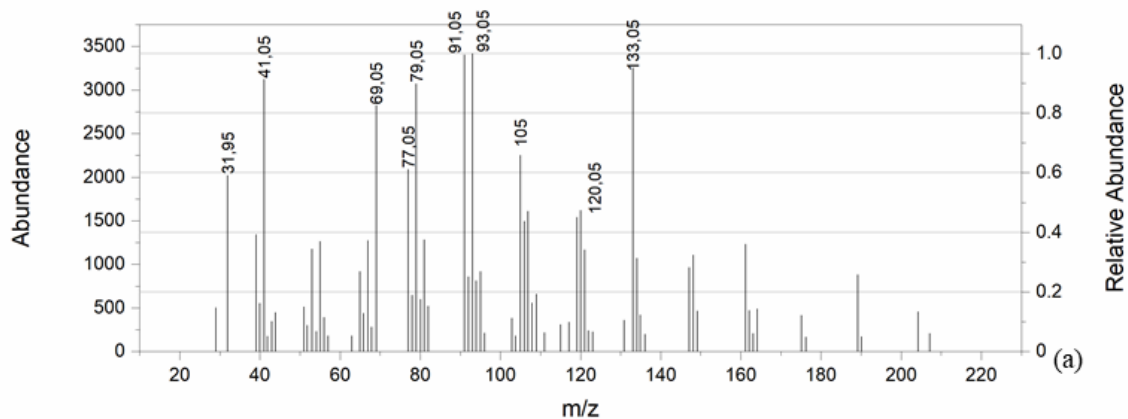

Caryophyllene

Mass Spectrum

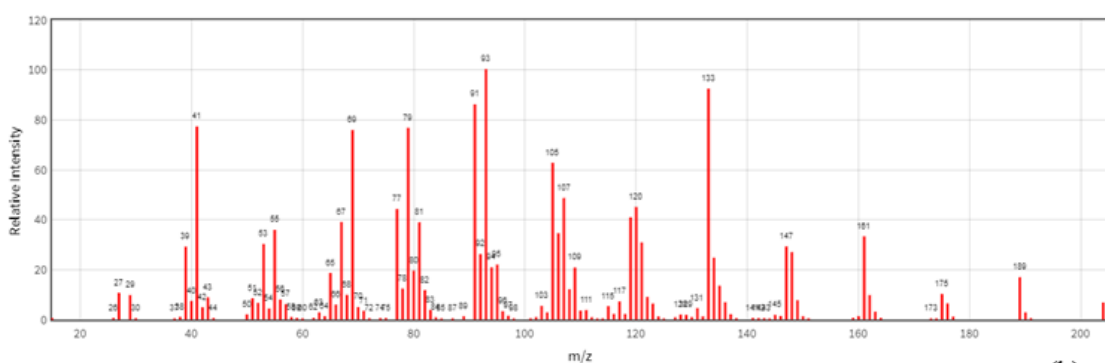

Caryophyllene  
MASS SPECTRUM

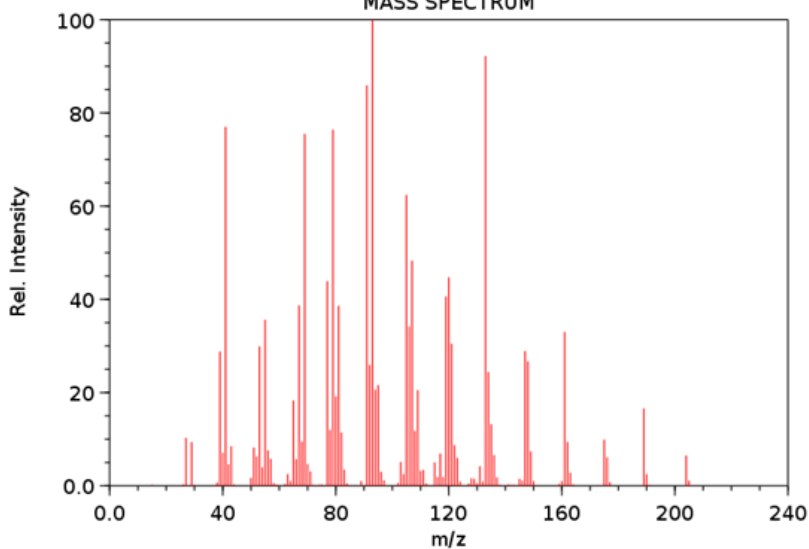

25

26 **Figure S3** Mass to charge ratio ( $m/z$ ) plot related to the chromatographic peak with retention  
 27 time of 33.24 min (a), identified as  $\beta$ -caryophyllene (caryophyllene), and the  $m/z$  plots for the  
 28 identified compound according to the NIST library (b) and (c).

29

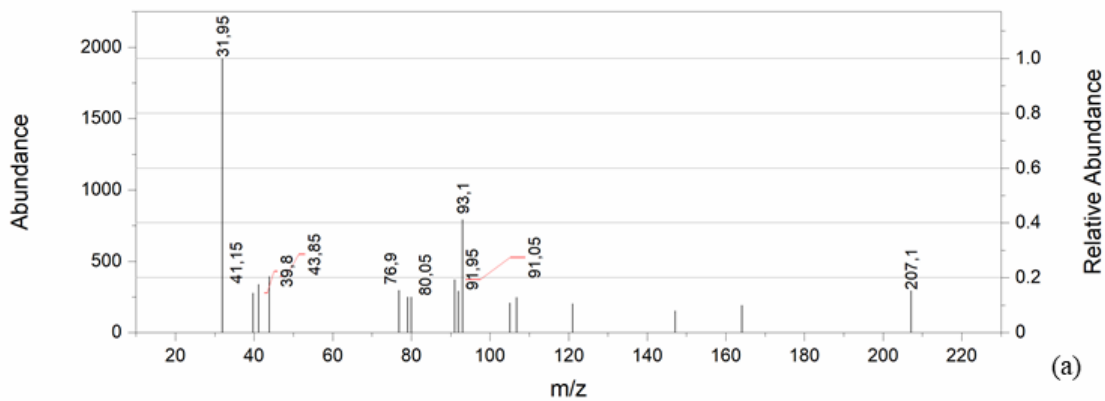

Humulene

Mass Spectrum

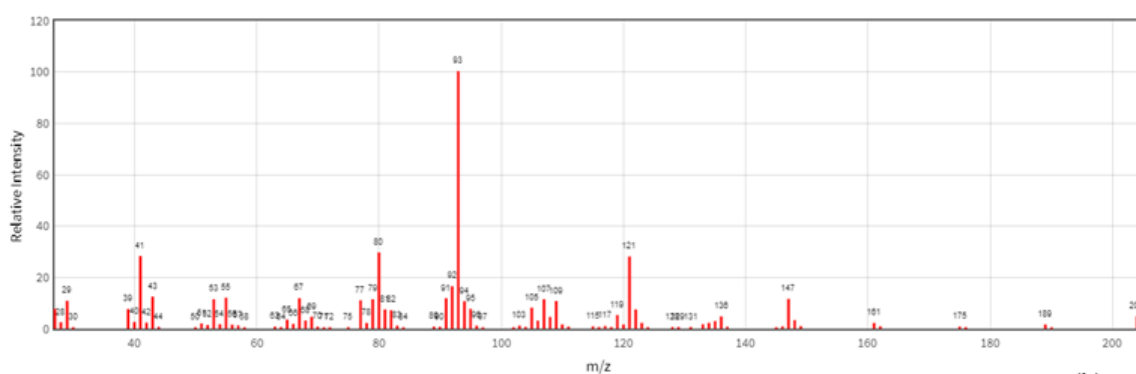

(b)

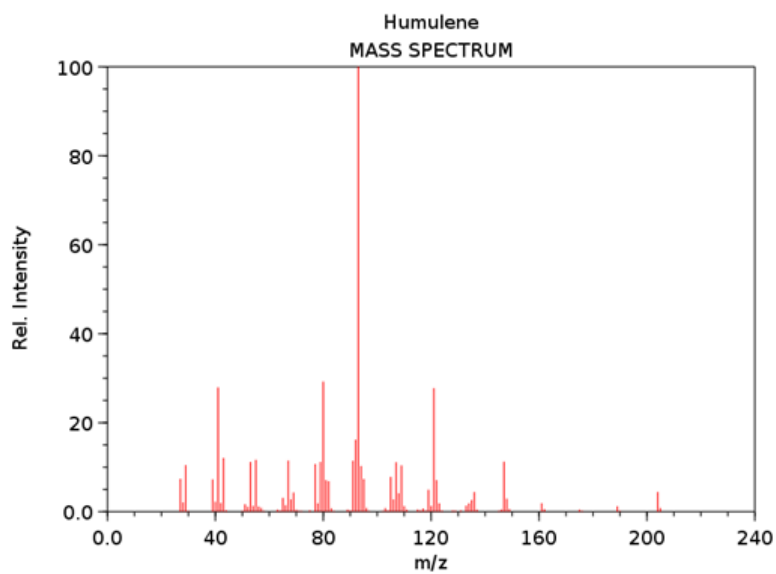

(c)

30

31 **Figure S4** Mass to charge ratio (m/z) plot related to the chromatographic peak with retention  
 32 time of 35.01 min (a), identified as  $\alpha$ -caryophyllene (humulene), and the m/z plots for the  
 33 identified compound according to the NIST library (b) and (c).

34

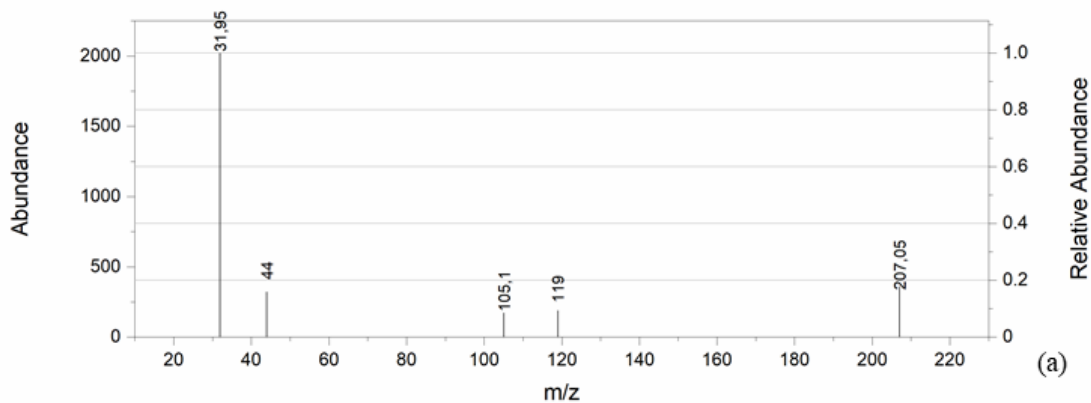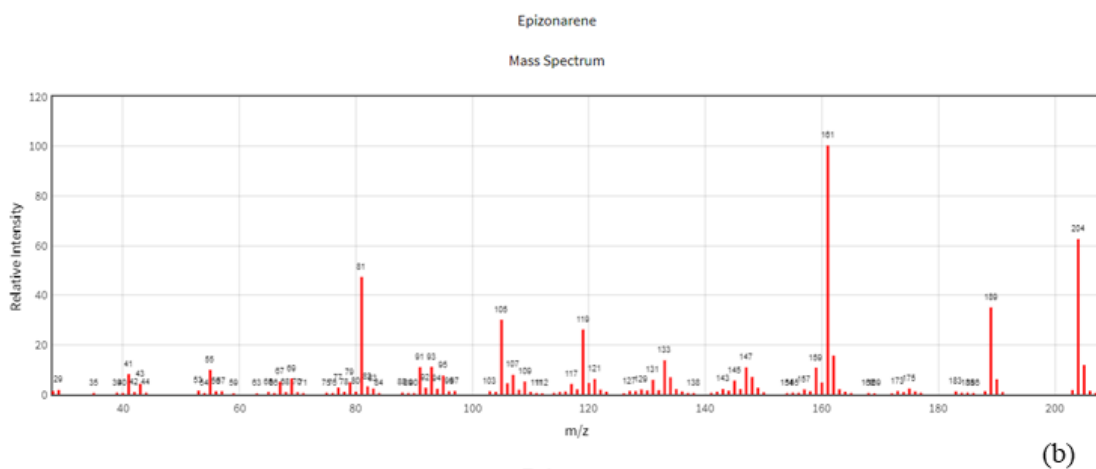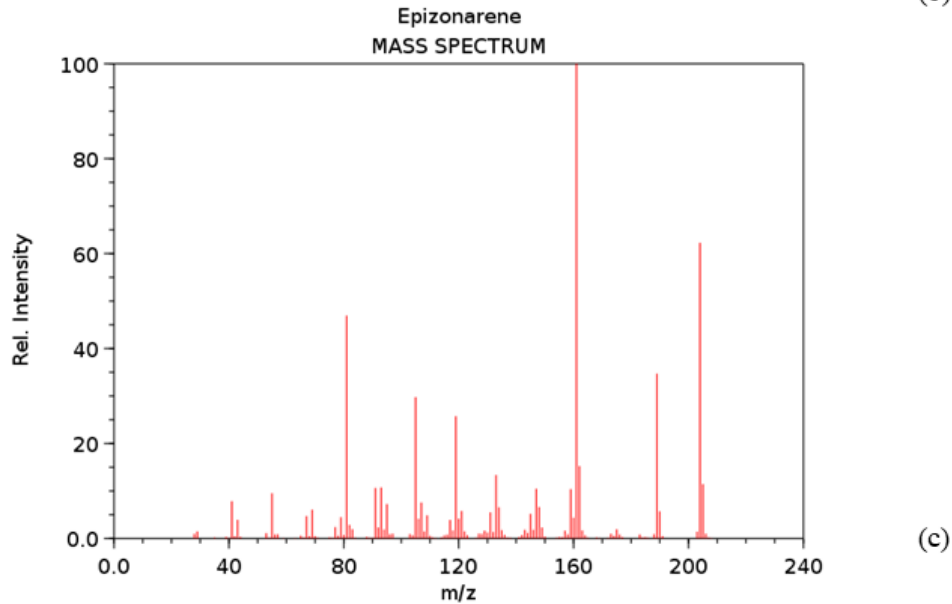

35

36 **Figure S5** Mass to charge ratio ( $m/z$ ) plot related to the chromatographic peak with retention  
 37 time of 39.06 min (a), tentatively identified as epizonarene, and the  $m/z$  plots for the identified  
 38 compound according to the NIST library (b) and (c).

39

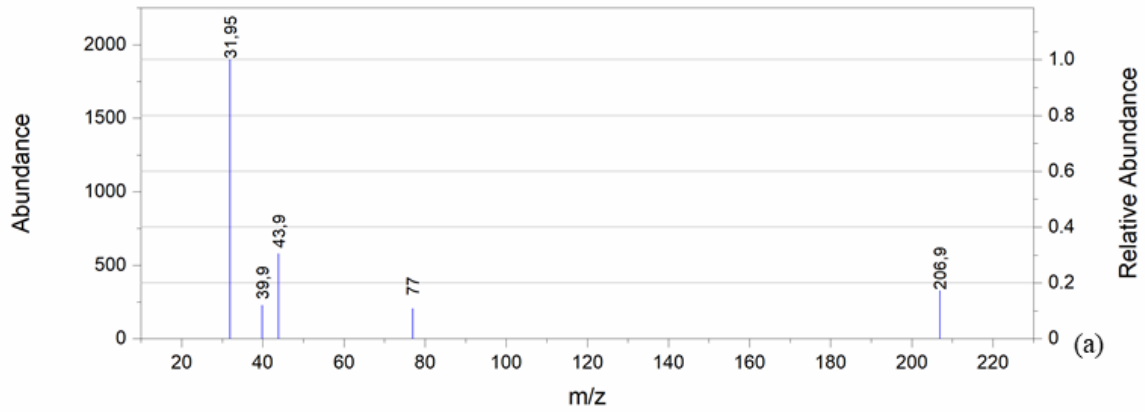

Caryophyllene oxide  
Mass Spectrum

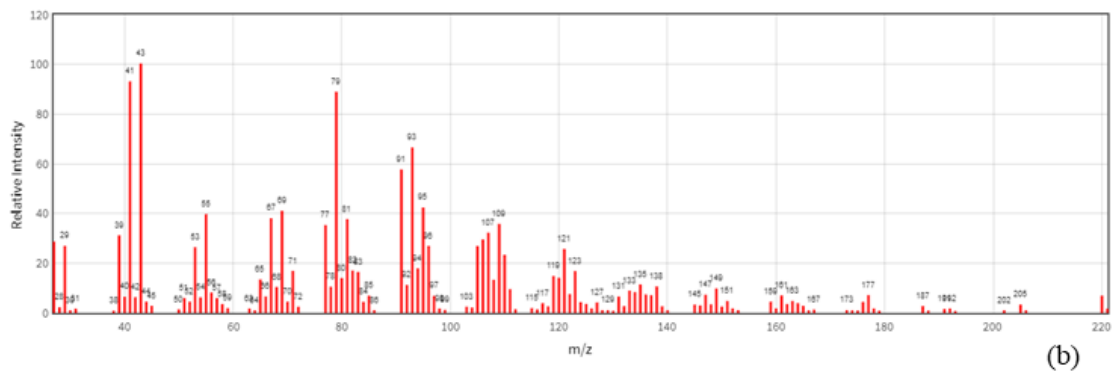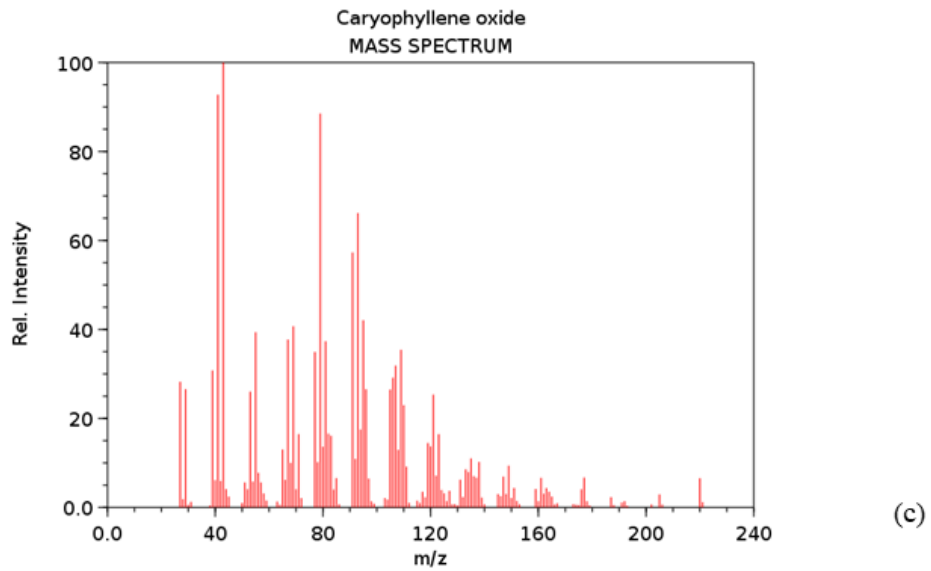

40

41 **Figure S6** Mass to charge ratio ( $m/z$ ) plot related to the chromatographic peak with retention  
 42 time of 42.35 min (a), tentatively identified as caryophyllene oxide, and the  $m/z$  plots for the  
 43 identified compound according to the NIST library (b) and (c).

44

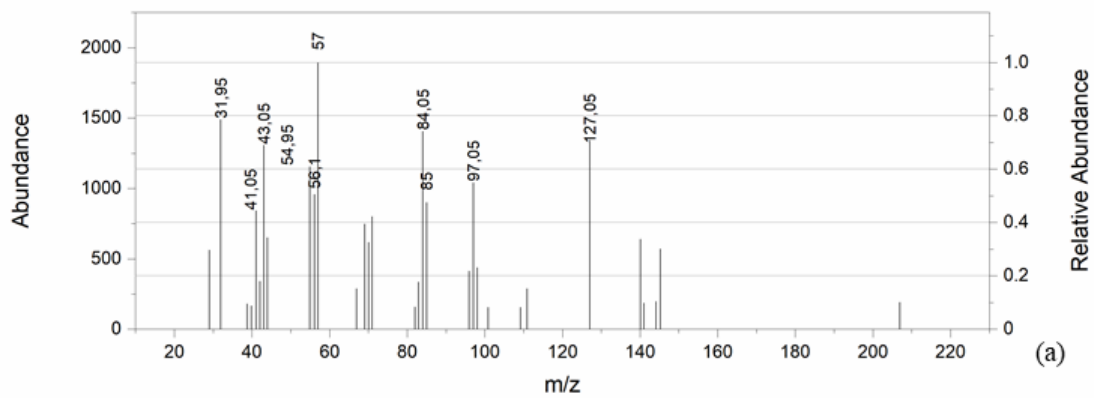

1-Hexadecanol  
Mass Spectrum

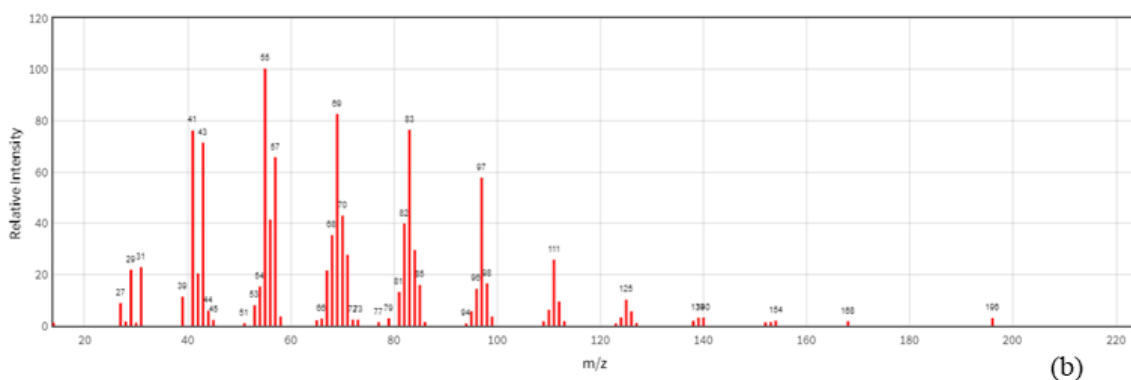

1-Hexadecanol  
MASS SPECTRUM

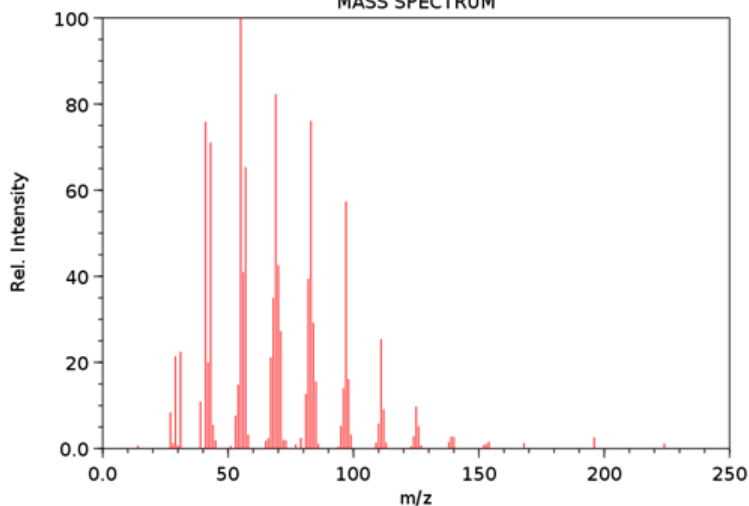

45  
46 **Figure S7** Mass to charge ratio ( $m/z$ ) plot related to the chromatographic peak with retention  
47 time of 58.24 min (a), tentatively identified as hexadecanol, and the  $m/z$  plots for the identified  
48 compound according to the NIST library (b) and (c).

49



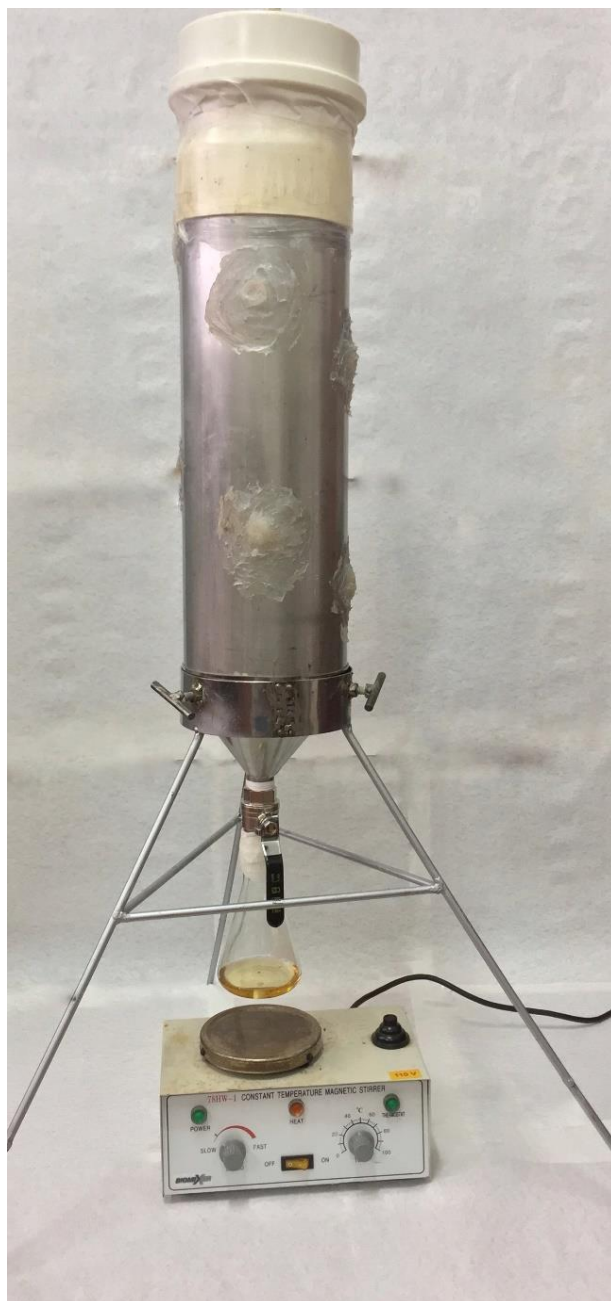

50

51 **Figure S8** Experimental apparatus used to determine the diffusion coefficient of eugenol  
52 through rice.
